# Supplementary material for: Montmorillonite-Sodium Alginate Oral Colon-Targeting Microcapsule Design for WGX-50 Encapsulation and Controlled Release in Gastro-Intestinal Tract
Source: MDPI journal article supplement (doi:10.3390/jfb15010003), 2023-12-19
Supplement: s1 [file s1]

Supplementary Materials

# Montmorillonite-Sodium Alginate Oral Colon-Targeting Microcapsule Design for WGX-50 Encapsulation and Controlled Release in Gastro-Intestinal Tract

Yibei Jiang <sup>1</sup>, Zhou Wang <sup>1</sup>, Ke Cao <sup>2</sup>, Lu Xia <sup>3</sup>, Dongqing Wei <sup>4,\*</sup> and Yi Zhang <sup>1,\*</sup>

<sup>1</sup> Department of Inorganic Materials, School of Minerals Processing and Bioengineering, Central South University, Changsha 410083, China; 215611016@csu.edu.cn (Y.J.); zhouwang@csu.edu.cn (Z.W.)

<sup>2</sup> Department of Oncology, The Third Xiangya Hospital of Central South University, Changsha 410078, China; csucaoke@163.com

<sup>3</sup> Center for Medical Genetics & Hunan Key Laboratory of Medical Genetics, School of Life Sciences, Central South University, Changsha 410078, China; xialu@sklmg.edu.cn

<sup>4</sup> State Key Laboratory of Microbial Metabolism, School of Life Sciences and Biotechnology, Shanghai Jiao Tong University, Shanghai 200240, China

\* Correspondence: yee\_z10@csu.edu.cn (Y.Z.); dqwei@sjtu.edu.cn (D.W.)

**Citation:** Jiang, Y.; Wang, Z.; Cao, K.; Xia, L.; Wei, D.; Zhang, Y. Montmorillonite-Sodium Alginate Oral Colon-Targeting Microcapsule Design for WGX-50 Encapsulation and Controlled Release in Gastro-Intestinal Tract. *J. Funct. Biomater.* **2023**, *15*, 3. <https://doi.org/10.3390/jfb15010003>

Academic Editor: Pankaj Vadgama

Received: 20 October 2023

Revised: 9 December 2023

Accepted: 11 December 2023

Published: 19 December 2023

**Publisher's Note:** MDPI stays neutral with regard to jurisdictional claims in published maps and institutional affiliations.

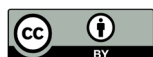

**Copyright:** © 2023 by the authors. Submitted for possible open access publication under the terms and conditions of the Creative Commons Attribution (CC BY) license (<https://creativecommons.org/licenses/by/4.0/>).

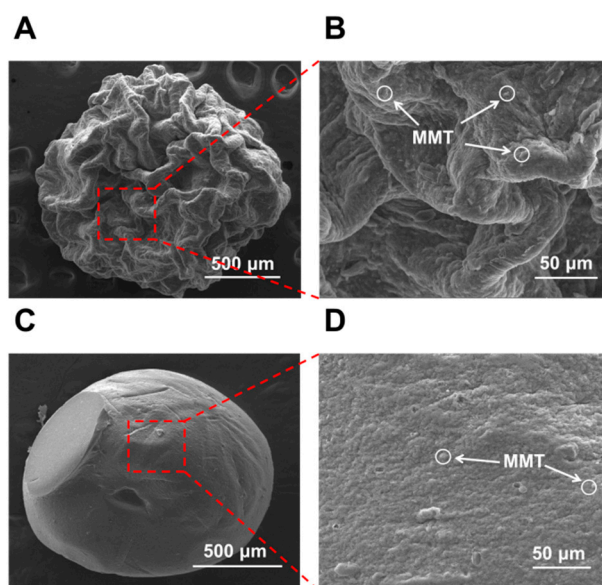

**Figure S1.** Freeze-dried microcapsules (A–B) and oven-dried microcapsules (C–D).

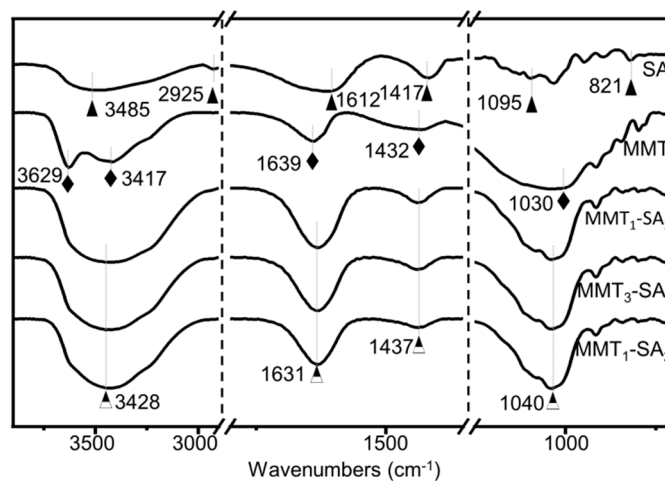

**Figure S2.** FTIR of SA, MMT, MMT<sub>1</sub>-SA<sub>3</sub>, MMT<sub>3</sub>-SA<sub>5</sub> and MMT<sub>1</sub>-SA<sub>2</sub> microcapsule.

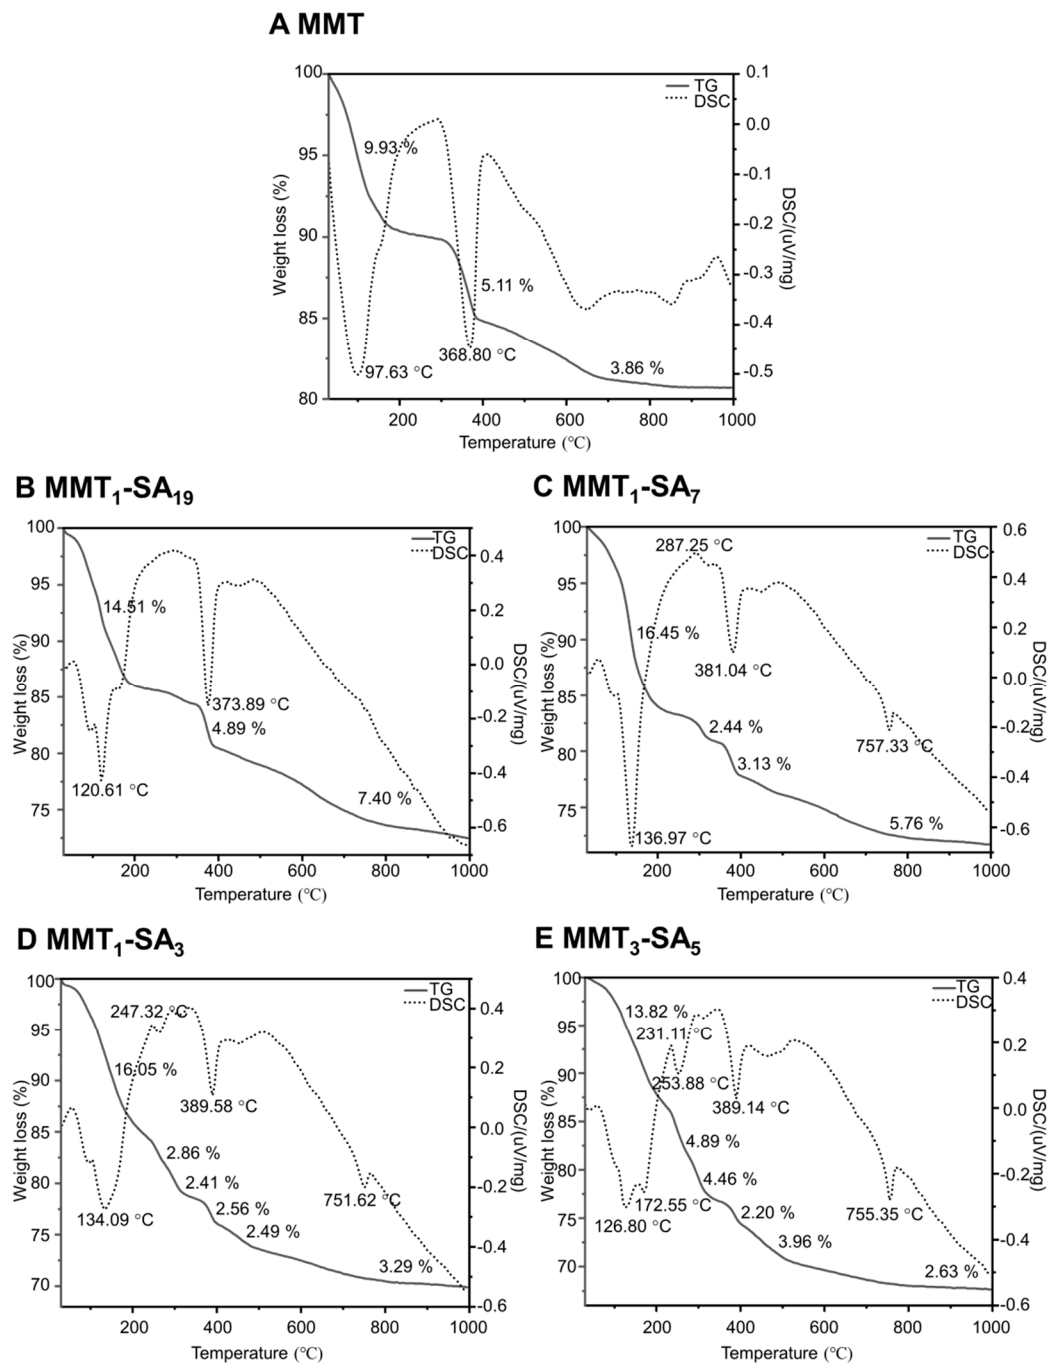

**Figure S3.** TG-DSC curves for (A) MMT, (B) MMT<sub>1</sub>-SA<sub>19</sub>, (C) MMT<sub>1</sub>-SA<sub>7</sub>, (D) MMT<sub>1</sub>-SA<sub>3</sub> and (E) MMT<sub>3</sub>-SA<sub>5</sub>.

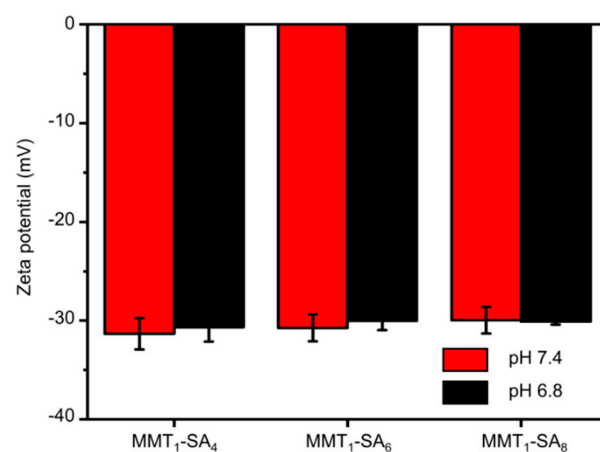

**Figure S4.** Zeta potentials of MMT<sub>1</sub>-SA<sub>4</sub>, MMT<sub>1</sub>-SA<sub>6</sub>, MMT<sub>1</sub>-SA<sub>8</sub> in different pH.

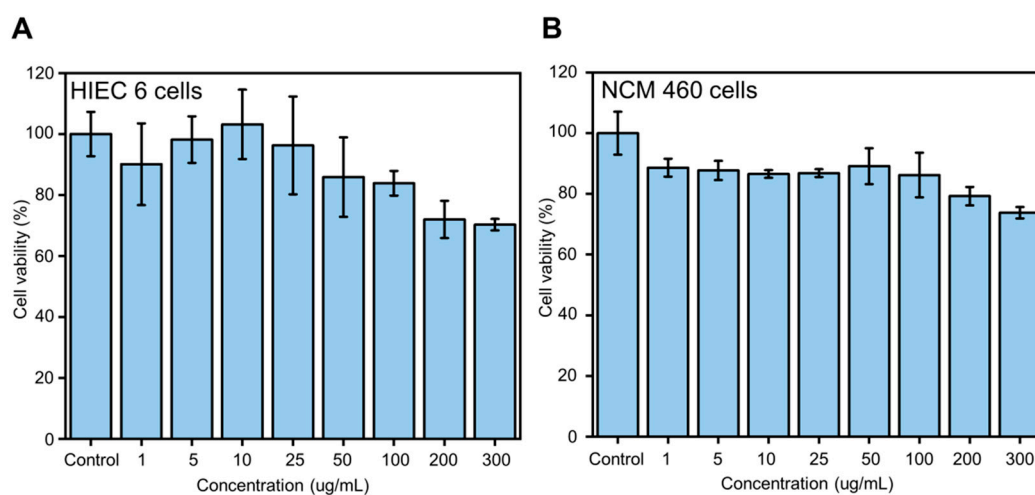

**Figure S5.** Cytotoxicity evaluation of MMT-SA to (A) HIEC-6 cells and (B) NCM-460 cells.

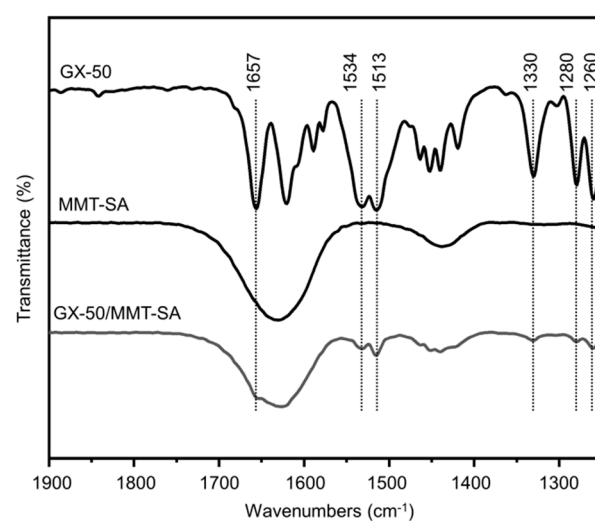

**Figure S6.** FTIR of WGX-50, MMT-SA and WGX-50/MMT-SA microcapsule.

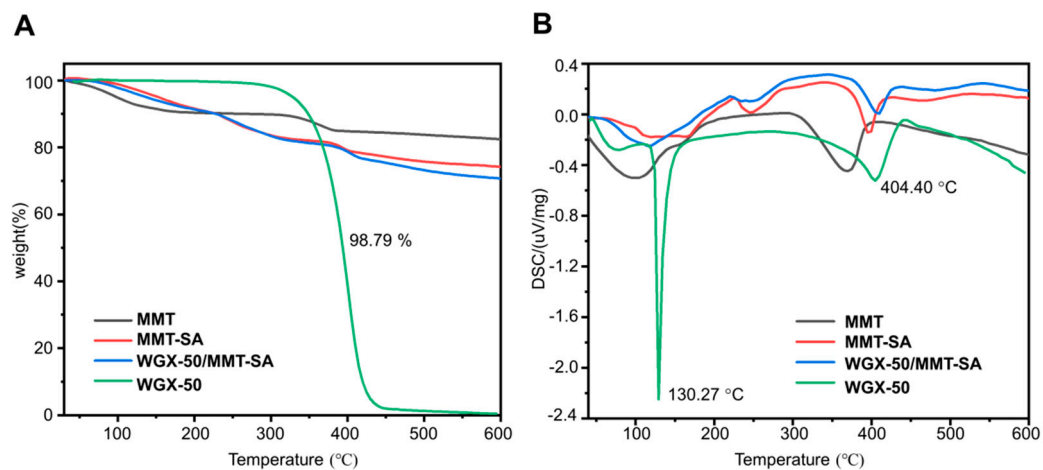

**Figure S7.** TG (A) and DSC (B) of MMT, MMT-SA, WGX-50 and WGX-50/MMT-SA microcapsule.

**Table S1.** The mixed mass ratios and labels of MMT-SA microcapsule.

| Samples                            | Sodium Alginate(mg) | MMT(mg) |
|------------------------------------|---------------------|---------|
| MTT                                | 0                   | 200     |
| MMT <sub>1</sub> -SA <sub>19</sub> | 10                  | 190     |
| MMT <sub>1</sub> -SA <sub>7</sub>  | 25                  | 175     |
| MMT <sub>1</sub> -SA <sub>3</sub>  | 50                  | 150     |
| MMT <sub>3</sub> -SA <sub>5</sub>  | 75                  | 125     |
| MMT <sub>1</sub> -SA <sub>2</sub>  | 75                  | 150     |
| MMT <sub>1</sub> -SA <sub>4</sub>  | 75                  | 300     |
| MMT <sub>1</sub> -SA <sub>6</sub>  | 75                  | 450     |
| MMT <sub>1</sub> -SA <sub>8</sub>  | 75                  | 600     |

**Table S2.** In vitro release data of WGX-50.

| Theoretical value of WGX-50 (mg) | WGX-50 Encapsulation (mg) | WGX-50/MMT-SA (mg) | EE (%) | SD      | DL (%) | SD      |
|----------------------------------|---------------------------|--------------------|--------|---------|--------|---------|
| 25                               | 24.81                     | 435.8              | 99.25  | 1.25E-4 | 5.71   | 5.57E-4 |
| 50                               | 49.80                     | 493.5              | 99.60  | 1.38E-4 | 10.09  | 1.40E-3 |
| 100                              | 99.62                     | 497.2              | 99.62  | 9.65E-5 | 20.04  | 2.89E-3 |
| 200                              | 199.34                    | 634.43             | 99.67  | 2.31E-5 | 31.43  | 6.53E-3 |

**Table S3.** Fitting results of WGX-50 release kinetics parameters using different models at pH 1.2, 6.8 and 7.4.

| Release condition | Zero-order     |          | First-order    |          | Higuchi        |        | Korsmeyer-Peppas |       |
|-------------------|----------------|----------|----------------|----------|----------------|--------|------------------|-------|
|                   | R <sup>2</sup> | k        | R <sup>2</sup> | k        | R <sup>2</sup> | k      | R <sup>2</sup>   | n     |
| pH 1.2            | 0.985          | 0.0321   | 0.978          | 5.540E-5 | 0.990          | 0.501  | 0.980            | 1.062 |
| pH 6.8            | 0.917          | 0.0171   | 0.774          | 3.046E-6 | 0.941          | 5.122  | 0.881            | 1.580 |
| pH 7.4            | 0.0255         | 4.210E-4 | 0.719          | 0.00857  | 0.0628         | 0.0404 | 0.122            | 0.013 |
